# Supplementary material for: Lack of collagen VI promotes neurodegeneration by impairing autophagy and inducing apoptosis during aging
Source: publisher site journal article supplement (doi:10.18632/aging.100924), 2016-04-07
Supplement: Supplementary file 1 [file aging-v8i5-100924-supplementary-material-SD1.docx]

Apache Tomcat/6.0.26 - Error report 

# HTTP Status 404 - No response action for uri: /papers/v100924/SupFigures.docx/nundefined/full/undefined

---

**type** Status report

**message** No response action for uri: /papers/v100924/SupFigures.docx/nundefined/full/undefined

**description** The requested resource (No response action for uri: /papers/v100924/SupFigures.docx/nundefined/full/undefined) is not available.

---

### Apache Tomcat/6.0.26
